# Supplementary material for: Prefrontal and hippocampal atrophy using 7-tesla magnetic resonance imaging in patients with Parkinson’s disease
Source: PubMed Central journal article supplement — Acta Radiol Open. 2021 Feb 24;10(2):2058460120988097. doi: 10.1177/2058460120988097 (PMC7958639; doi:10.1177/2058460120988097), 2021-02-24
Supplement: sj-pdf-1-arr-10.1177_2058460120988097.pdf [file sj-pdf-1-arr-10.1177_2058460120988097.pdf]

**Table 1. Comparison of cortical volume between the PD and HC groups.**

|                           | Parkinson's disease (n = 12) |            | Healthy controls (n = 12) |            | <i>p</i> -value |            |
|---------------------------|------------------------------|------------|---------------------------|------------|-----------------|------------|
|                           | Left hemi                    | Right hemi | Left hemi                 | Right hemi | Left hemi       | Right hemi |
| Caudal anterior cingulate | 2763.08                      | 2030.5     | 3079.08                   | 2206.33    | NS              | NS         |
| Caudal middle frontal     | 5547.83                      | 5119.5     | 6497.33                   | 5927.42    | NS              | NS         |
| Cuneus                    | 3808.42                      | 3386.67    | 3621.83                   | 3159       | NS              | NS         |
| Entorhinal                | 1279.75                      | 1167.92    | 1381.17                   | 1256.75    | NS              | NS         |
| Fusiform                  | 5529.17                      | 5820.75    | 6817.08                   | 6114.92    | *0.034          | NS         |
| Inferior parietal         | 10132.25                     | 11011      | 11417.58                  | 13497.42   | NS              | *0.023     |
| Inferior temporal         | 6261.42                      | 6966.42    | 6998.5                    | 6833.83    | NS              | NS         |
| Isthmus cingulate         | 2281.17                      | 1855.5     | 1973.25                   | 2228.91    | NS              | NS         |
| Lateral occipital         | 10277.42                     | 10967.5    | 11362                     | 11602.08   | NS              | NS         |
| Lateral orbitofrontal     | 6999.17                      | 6636       | 7132.42                   | 6850.08    | NS              | NS         |
| Lingual                   | 5280.83                      | 5429.5     | 5162                      | 6339.08    | NS              | NS         |
| Medial orbitofrontal      | 3591.58                      | 3325.67    | 3788                      | 3605.58    | NS              | *0.049     |
| Middle temporal           | 8409.83                      | 9441.75    | 9499.67                   | 10080.58   | NS              | NS         |
| Parahippocampal           | 1700.75                      | 1794.08    | 2018.67                   | 1978.33    | NS              | NS         |
| Paracentral               | 4496.25                      | 4230.83    | 4102.33                   | 4397.83    | NS              | NS         |
| Pars opercularis          | 3680.17                      | 3583.92    | 3775.92                   | 3693.67    | NS              | NS         |
| Pars orbitalis            | 1719.33                      | 1625.58    | 1761.67                   | 1683.75    | NS              | NS         |

|                            |          |          |          |          |        |        |
|----------------------------|----------|----------|----------|----------|--------|--------|
| Pars triangularis          | 3936.08  | 3454.17  | 3984.17  | 3298.58  | NS     | NS     |
| Pericalcarine              | 2008.17  | 2377.67  | 1774.42  | 2083.08  | NS     | NS     |
| Postcentral                | 10938.5  | 9531.75  | 10725.08 | 10301.33 | NS     | NS     |
| Posterior cingulate        | 2926.58  | 3090     | 3116.17  | 3360.83  | NS     | NS     |
| Precentral                 | 12170.08 | 11540.58 | 12986    | 11994    | NS     | NS     |
| Precuneus                  | 8327.42  | 7776.08  | 7216.67  | 8043.92  | NS     | NS     |
| Rostral anterior cingulate | 2744.25  | 1707.25  | 2927     | 1985.08  | NS     | *0.046 |
| Rostral middle frontal     | 8694.33  | 8892.33  | 10198.83 | 9685.67  | *0.047 | NS     |
| Superior frontal           | 19067.33 | 22063.58 | 21613.92 | 23243.42 | *0.028 | NS     |
| Superior parietal          | 10314.25 | 9991.67  | 9468     | 9672.5   | NS     | NS     |
| Superior temporal          | 12573.17 | 11697.5  | 13640.42 | 12589.33 | NS     | NS     |
| Supramarginal              | 9377.17  | 7873.25  | 9677     | 8931.5   | NS     | NS     |
| Transverse temporal        | 1073.92  | 761.25   | 1090.08  | 868.17   | NS     | NS     |
| Insula                     | 5382.67  | 5347.75  | 5345.5   | 5497     | NS     | NS     |

*Abbreviations: NS, Not significant*

*The PD and HC groups were compared using the independent t test, and nonparametric data analysis was performed using the Mann-Whitney U test. The thresholds of significance were as follows: \* $p < 0.05$ , \*\* $p < 0.01$ , and \*\*\* $p < 0.001$ .*

**Table 2. Comparison of cortical thickness between the PD and the HC groups.**

|                           | Parkinson's disease (n=12) |            | Healthy controls (n=12) |            | <i>p</i> -value |            |
|---------------------------|----------------------------|------------|-------------------------|------------|-----------------|------------|
|                           | Left hemi                  | Right hemi | Left hemi               | Right hemi | Left hemi       | Right hemi |
| Caudal anterior cingulate | 2.41225                    | 2.42033    | 2.489                   | 2.3065     | NS              | NS         |
| Caudal middle frontal     | 2.25375                    | 2.22458    | 2.35708                 | 2.29408    | NS              | NS         |
| Cuneus                    | 1.876                      | 1.84983    | 1.89125                 | 1.83433    | NS              | NS         |
| Entorhinal                | 2.64417                    | 2.56158    | 2.6475                  | 2.62358    | NS              | NS         |
| Fusiform                  | 2.11025                    | 2.22325    | 2.24717                 | 2.24958    | *0.049          | NS         |
| Inferior parietal         | 2.11617                    | 2.19283    | 2.21408                 | 2.2385     | NS              | NS         |
| Inferior temporal         | 2.15967                    | 2.17108    | 2.13958                 | 2.16567    | NS              | NS         |
| Isthmus cingulate         | 1.97133                    | 1.82258    | 1.95717                 | 1.95675    | NS              | NS         |
| Lateral occipital         | 1.95692                    | 2.03       | 2.01483                 | 2.08542    | NS              | NS         |
| Lateral orbitofrontal     | 2.34858                    | 2.16675    | 2.37408                 | 2.26917    | NS              | NS         |
| Lingual                   | 1.85267                    | 1.89542    | 1.88283                 | 1.903      | NS              | NS         |
| Medial orbitofrontal      | 2.03917                    | 2.06758    | 2.079                   | 2.15475    | NS              | NS         |
| Middle temporal           | 2.16283                    | 2.23542    | 2.27433                 | 2.27275    | NS              | NS         |
| Parahippocampal           | 2.24175                    | 2.11825    | 2.24608                 | 2.29317    | NS              | *0.018     |
| Paracentral               | 2.09992                    | 2.08367    | 2.16075                 | 2.23533    | NS              | NS         |
| Pars opercularis          | 2.30608                    | 2.25817    | 2.36533                 | 2.268      | NS              | NS         |
| Pars orbitalis            | 2.34975                    | 2.14925    | 2.44892                 | 2.24633    | NS              | NS         |

|                            |         |         |         |         |    |    |
|----------------------------|---------|---------|---------|---------|----|----|
| Pars triangularis          | 2.21083 | 2.13308 | 2.29275 | 2.15417 | NS | NS |
| Pericalcarine              | 1.6865  | 1.74333 | 1.64583 | 1.64808 | NS | NS |
| Postcentral                | 2.00367 | 1.96125 | 2.00208 | 1.987   | NS | NS |
| Posterior cingulate        | 2.1045  | 2.11317 | 2.1145  | 2.07325 | NS | NS |
| Precentral                 | 2.31825 | 2.25592 | 2.37192 | 2.3235  | NS | NS |
| Precuneus                  | 2.04383 | 1.95467 | 2.01667 | 2.02258 | NS | NS |
| Rostral anterior cingulate | 2.28108 | 2.32242 | 2.33283 | 2.39542 | NS | NS |
| Rostral middle frontal     | 2.08958 | 2.04333 | 2.16892 | 2.07642 | NS | NS |
| Superior frontal           | 2.301   | 2.29917 | 2.3735  | 2.59967 | NS | NS |
| Superior parietal          | 1.98675 | 2.06092 | 2.06642 | 2.08467 | NS | NS |
| Superior temporal          | 2.26175 | 2.30083 | 2.34625 | 2.31967 | NS | NS |
| Supramarginal              | 2.20025 | 2.18292 | 2.29875 | 2.27267 | NS | NS |
| Transverse temporal        | 2.00475 | 2.12117 | 2.10883 | 2.074   | NS | NS |
| Insula                     | 2.58417 | 2.52583 | 2.65925 | 2.64642 | NS | NS |

*Abbreviations: NS, Not significant*

*The PD and HC groups were compared using the independent t test, and nonparametric data analysis was performed using the Mann-Whitney U test. The thresholds of significance were as follows: \* $p < 0.05$ , \*\* $p < 0.01$ , and \*\*\* $p < 0.001$ .*

**Table 3. Comparison of subcortical volume between the PD and HC groups.**

|                           | Parkinson's disease (n=12) |            | Healthy controls (n=12) |            | p-value   |            |
|---------------------------|----------------------------|------------|-------------------------|------------|-----------|------------|
|                           | Left hemi                  | Right hemi | Left hemi               | Right hemi | Left hemi | Right hemi |
| Lateral-ventricle         | 14663.88                   | 10874.9    | 10139.43                | 8486.66    | NS        | NS         |
| Cerebellum-white-matter   | 7082.28                    | 5829.66    | 9892.57                 | 8338.94    | NS        | *0.045     |
| Cerebellum-cortex         | 21729.63                   | 22506.33   | 27758.12                | 29117.14   | *0.013    | **0.004    |
| Thalamus                  | 8125.39                    | 7364.69    | 8109.31                 | 7438.46    | NS        | NS         |
| Caudate                   | 2957.04                    | 2935.87    | 2932.26                 | 3071.36    | NS        | NS         |
| Putamen                   | 4620.29                    | 4403.55    | 4575.17                 | 4659.67    | NS        | NS         |
| Pallidum                  | 2085.34                    | 1995.18    | 2089.57                 | 2090.74    | NS        | NS         |
| Hippocampus               | 3210.77                    | 2549.78    | 3327.99                 | 3513.46    | NS        | **0.005    |
| Amygdala                  | 1152.23                    | 1076.71    | 1274.57                 | 1462.43    | NS        | *0.021     |
| Accumbens area            | 309.88                     | 331.81     | 360.14                  | 391.01     | NS        | NS         |
| Corpus callosum anterior  |                            | 1192.95    |                         | 964.68     |           | NS         |
| Corpus callosum central   |                            | 937.33     |                         | 992.51     |           | NS         |
| Corpus callosum posterior |                            | 1107.71    |                         | 1173.53    |           | NS         |

*Abbreviations: NS, Not significant*

*The PD and HC groups were compared using the independent t test, and nonparametric data analysis was performed using the Mann-Whitney U test. The thresholds of significance were as follows: \* $p < 0.05$ , \*\* $p < 0.01$ , and \*\*\* $p < 0.001$ .*

**Table 4. Comparison of cortical volume between the PD patients with and without axial symptoms.**

|                           | PD with Axial Sx. (n = 5) |            | PD without Axial Sx. (n = 7) |            | <i>p</i> -value |            |
|---------------------------|---------------------------|------------|------------------------------|------------|-----------------|------------|
|                           | Left hemi                 | Right hemi | Left hemi                    | Right hemi | Left hemi       | Right hemi |
| Caudal anterior cingulate | 2701.6                    | 1950.6     | 2807                         | 2087.6     | NS              | NS         |
| Caudal middle frontal     | 6151.4                    | 5476       | 5116.7                       | 4864.9     | NS              | NS         |
| Cuneus                    | 4243.6                    | 3500.2     | 3497.6                       | 3305.6     | NS              | NS         |
| Entorhinal                | 1227.6                    | 1036.8     | 1317                         | 1261.6     | NS              | NS         |
| Fusiform                  | 5414.4                    | 5494.6     | 5611.1                       | 6053.7     | NS              | NS         |
| Inferior parietal         | 10356.8                   | 11411      | 9971.9                       | 10725.3    | NS              | NS         |
| Inferior temporal         | 6048.6                    | 6257.2     | 6413.4                       | 7473       | NS              | NS         |
| Isthmus cingulate         | 2336.6                    | 2020       | 2241.6                       | 1738       | NS              | NS         |
| Lateral occipital         | 10306                     | 10469      | 10257                        | 11323.6    | NS              | NS         |
| Lateral orbitofrontal     | 6803                      | 6581       | 7139.3                       | 6675.4     | NS              | NS         |
| Lingual                   | 5305.6                    | 5429.6     | 5263.1                       | 5429.4     | NS              | NS         |
| Medial orbitofrontal      | 3660.8                    | 3225.2     | 3542.1                       | 3397.4     | NS              | NS         |
| Middle temporal           | 8857.4                    | 8897.8     | 8090.1                       | 9830.3     | NS              | NS         |
| Parahippocampal           | 1756.8                    | 1859       | 1660.7                       | 1747.7     | NS              | NS         |
| Paracentral               | 3951.6                    | 3740       | 4885.2                       | 4581.4     | NS              | *0.030     |
| Pars opercularis          | 3767.2                    | 3850.8     | 3618                         | 3393.3     | NS              | NS         |
| Pars orbitalis            | 1644                      | 1634.4     | 1773.1                       | 1619.3     | NS              | NS         |

|                            |         |         |         |         |    |    |
|----------------------------|---------|---------|---------|---------|----|----|
| Pars triangularis          | 3719.6  | 3243.2  | 4090.7  | 3604.9  | NS | NS |
| Pericalcarine              | 2347.2  | 2402.8  | 1766    | 2359.7  | NS | NS |
| Postcentral                | 10486.8 | 9675.8  | 11261.1 | 9428.9  | NS | NS |
| Posterior cingulate        | 2670.2  | 2861.8  | 3109.7  | 3253    | NS | NS |
| Precentral                 | 12505   | 11460   | 11930.9 | 11598.1 | NS | NS |
| Precuneus                  | 8036.2  | 7604.8  | 8535.4  | 7898.4  | NS | NS |
| Rostral anterior cingulate | 2853.4  | 1743.8  | 2666.3  | 1681.1  | NS | NS |
| Rostral middle frontal     | 9130.4  | 8638.8  | 8382.9  | 9073.4  | NS | NS |
| Superior frontal           | 19569.2 | 22562.4 | 18708.9 | 21707.3 | NS | NS |
| Superior parietal          | 10898.8 | 10650.2 | 9896.7  | 9521.3  | NS | NS |
| Superior temporal          | 12113.4 | 11944.4 | 12901.6 | 11521.1 | NS | NS |
| Supramarginal              | 8520.4  | 8273.8  | 9989.1  | 7587.1  | NS | NS |
| Transverse temporal        | 1125.2  | 827.6   | 1037.3  | 713.9   | NS | NS |
| Insula                     | 5321    | 5519.8  | 5426.7  | 5224.9  | NS | NS |

---

*Abbreviations: NS, Not significant*

*The PD patients with and without axial symptoms were compared using the Mann-Whitney U test. The thresholds of significance were as follows:*

*\* $p < 0.05$ , \*\* $p < 0.01$ , and \*\*\* $p < 0.001$ .*

**Table 5. Comparison of cortical thickness between the PD patients with and without axial symptoms**

|                           | PD with Axial Sx. (n = 5) |            | PD without Axial Sx. (n = 7) |            | <i>p</i> -value |            |
|---------------------------|---------------------------|------------|------------------------------|------------|-----------------|------------|
|                           | Left hemi                 | Right hemi | Left hemi                    | Right hemi | Left hemi       | Right hemi |
| Caudal anterior cingulate | 2.4148                    | 2.3994     | 2.4104                       | 2.4353     | NS              | NS         |
| Caudal middle frontal     | 2.3324                    | 2.2652     | 2.1976                       | 2.1956     | NS              | NS         |
| Cuneus                    | 1.8484                    | 1.8036     | 1.8957                       | 1.8829     | NS              | NS         |
| Entorhinal                | 2.6534                    | 2.6836     | 2.6376                       | 2.4744     | NS              | NS         |
| Fusiform                  | 2.0728                    | 2.2038     | 2.137                        | 2.2371     | NS              | NS         |
| Inferior parietal         | 2.1314                    | 2.2344     | 2.1053                       | 2.1631     | NS              | NS         |
| Inferior temporal         | 2.151                     | 2.1796     | 2.1659                       | 2.165      | NS              | NS         |
| Isthmus cingulate         | 1.9642                    | 1.8868     | 1.9764                       | 1.7767     | NS              | NS         |
| Lateral occipital         | 1.9504                    | 2.0838     | 1.9616                       | 1.9916     | NS              | NS         |
| Lateral orbitofrontal     | 2.3182                    | 2.2588     | 2.3703                       | 2.101      | NS              | NS         |
| Lingual                   | 1.8244                    | 1.8958     | 1.8729                       | 1.8951     | NS              | NS         |
| Medial orbitofrontal      | 2.0402                    | 2.147      | 2.0384                       | 2.0109     | NS              | NS         |
| Middle temporal           | 2.1914                    | 2.2384     | 2.1424                       | 2.2333     | NS              | NS         |
| Parahippocampal           | 2.191                     | 2.1316     | 2.278                        | 2.1087     | NS              | NS         |
| Paracentral               | 1.994                     | 2.031      | 2.1756                       | 2.1213     | NS              | NS         |
| Pars opercularis          | 2.3166                    | 2.2754     | 2.2986                       | 2.2459     | NS              | NS         |
| Pars orbitalis            | 2.295                     | 2.1472     | 2.3889                       | 2.1507     | NS              | NS         |



|                            |        |        |        |        |    |    |
|----------------------------|--------|--------|--------|--------|----|----|
| Pars triangularis          | 2.186  | 2.165  | 2.22   | 2.1103 | NS | NS |
| Pericalcarine              | 1.7008 | 1.6834 | 1.6763 | 1.7861 | NS | NS |
| Postcentral                | 1.9654 | 1.9142 | 2.031  | 1.9949 | NS | NS |
| Posterior cingulate        | 2.041  | 2.0446 | 2.1499 | 2.1621 | NS | NS |
| Precentral                 | 2.3048 | 2.2532 | 2.3279 | 2.2579 | NS | NS |
| Precuneus                  | 2.0654 | 1.9678 | 2.0284 | 1.9453 | NS | NS |
| Rostral anterior cingulate | 2.3572 | 2.282  | 2.2267 | 2.3513 | NS | NS |
| Rostral middle frontal     | 2.1236 | 2.0356 | 2.0653 | 2.0489 | NS | NS |
| Superior frontal           | 2.2584 | 2.2842 | 2.3314 | 2.3099 | NS | NS |
| Superior parietal          | 2.0474 | 2.063  | 1.9434 | 2.0594 | NS | NS |
| Superior temporal          | 2.224  | 2.3204 | 2.2887 | 2.2869 | NS | NS |
| Supramarginal              | 2.2808 | 2.2026 | 2.1427 | 2.1689 | NS | NS |
| Transverse temporal        | 1.98   | 2.1552 | 2.0224 | 2.0969 | NS | NS |
| Insula                     | 2.5604 | 2.4748 | 2.6011 | 2.5623 | NS | NS |

---

*Abbreviations: NS, Not significant*

*The PD patients with and without axial symptoms were compared using the Mann-Whitney U test. The thresholds of significance were as follows:*

*\* $p < 0.05$ , \*\* $p < 0.01$ , and \*\*\* $p < 0.001$ .*

**Table 6. Comparison of subcortical volume between the PD patients with and without axial symptoms.**

|                           | PD with Axial Sx. (n = 5) |            | PD without Axial Sx. (n = 7) |            | <i>p</i> -value |            |
|---------------------------|---------------------------|------------|------------------------------|------------|-----------------|------------|
|                           | Left hemi                 | Right hemi | Left hemi                    | Right hemi | Left hemi       | Right hemi |
| Lateral-ventricle         | 16227.08                  | 10512.86   | 13547.31                     | 11133.5    | NS              | NS         |
| Cerebellum-white-matter   | 7099.9                    | 6007.4     | 7069.69                      | 5702.7     | NS              | NS         |
| Cerebellum-cortex         | 20497                     | 20053.14   | 22610.07                     | 24258.61   | NS              | NS         |
| Thalamus                  | 8236.72                   | 7233.4     | 8045.87                      | 7458.47    | NS              | NS         |
| Caudate                   | 2727.22                   | 2907.32    | 3121.2                       | 2956.26    | NS              | NS         |
| Putamen                   | 4483.28                   | 4372.58    | 4718.16                      | 4425.67    | NS              | NS         |
| Pallidum                  | 2035.74                   | 1949.58    | 2120.77                      | 2027.76    | NS              | NS         |
| Hippocampus               | 3140.7                    | 2489.36    | 3260.81                      | 2592.94    | NS              | NS         |
| Amygdala                  | 1135.14                   | 1130.04    | 1164.43                      | 1038.61    | NS              | NS         |
| Accumbens area            | 336.6                     | 351.38     | 290.8                        | 317.83     | NS              | NS         |
| Corpus callosum anterior  |                           | 1309.42    |                              | 1109.76    |                 | NS         |
| Corpus callosum central   |                           | 787.22     |                              | 1044.54    |                 | *0.030     |
| Corpus callosum posterior |                           | 1080.48    |                              | 1127.16    |                 | NS         |

*Abbreviations: NS, Not significant*

*The PD patients with and without axial symptoms were compared using the Mann-Whitney U test. The thresholds of significance were as follows:*

*\* $p < 0.05$ , \*\* $p < 0.01$ , and \*\*\* $p < 0.001$ .*
